# Supplementary material for: Loss of Msh2 and a single-radiation hit induce common, genome-wide, and persistent epigenetic changes in the intestine
Source: Clin Epigenetics. 2019 Apr 27;11:65. doi: 10.1186/s13148-019-0639-8 (PMC6486978; doi:10.1186/s13148-019-0639-8)
Supplement: Supplementary file 1 — Primer sequences. List of all primers used in the study. (XLSX 10 kb) [file 13148_2019_639_MOESM1_ESM.xlsx]

## Sheet: Primer Sequences
Addtional file 1
Table Primer sequences
gene				primer			reaction conditions
name	amplicon length [bp]	in silico specifity screen	location	name	sequence (5'… 3')		annealing temperature [°C]	number of cycles
ChIP-Seq validation
Dkk1	97	UCSC In-Silico PCR Tool	promoter	Dkk1_for	GCGAGGGGAGAGTGTCAAAG		60	40
				Dkk1_rev	AACAAAGCCGGGATGGGATT
Mcm4	226	UCSC In-Silico PCR Tool	exon 1/intron 1	Mcm4-K4_for	GGGACAACTGAGAGCCAGAT		60	40
				Mcm4-K4_rev	CTCAAGGCCTGTCAACCACA
	131	UCSC In-Silico PCR Tool	intron 10	Mcm4-K36_for	TGCTGGTCAAGTTGTAGGACAa		60	40
				Mcm4-K36_rev	CGCCCGGCTGGTACTTTT
Notch1	127	UCSC In-Silico PCR Tool	intron 1	Notch1-K4_for	ATGTGCCCTGGACTCCTAGT		60	40
				Notch1-K4_rev	TCCGAAATGAGTCAGTCCCAC
	183	UCSC In-Silico PCR Tool	intron 24	Notch1-K36_for	AGCCTGAAGACCTCTAGCAGA		60	40
				Notch1-K36_rev	CAGGGTCTTGTTGTGAAGCCT
Tcf4	118	UCSC In-Silico PCR Tool	5'-UTR	Tcf4_for	CTTTATAAGCCGCAGTGCCC		62	40
				Tcf4-rev	CATCATCCTCCTCCCCAACAC
Wnt11	164	UCSC In-Silico PCR Tool	promoter /intron1	Wnt11_for	AGTGGCCGTGGCTAATGTTA		60	40
				Wnt11_rev	TACTCGAAATGCTGCGGAGG
ChIP-Seq quality control
Actb				posH3K36me3_for	CTTCACACCTTCCTGCTGTC	positive control for: H3K36me3
				posH3K36me3_rev	CACACCCTTTGCCTCCATC
Background				Backgr_for	TGGGTAACGGCTTCCTAATG	negative control for: H3K4me3
				Backgr_rev	GGAACTTTGCACAGGAGGAG
Gapdh				Gapdh_for	GCACCAGCATCCCTAGACC	positive control for: H3K4me3
				Gapdh_rev	GTGCAGTGCCAGGTGAAAAT	negative control for: H3K36me3
Hoxc11				Hoxc11_for	TAGTTTGCTCCCGATTCCTC	positive control for: H3K27me3
				Hoxc11_rev	GCCCTCCTAATGCTTCTGC
Pten				Pten_for	TGGGCAGCCACATATGATTACA	negative control for: H3K27me3
				Pten_rev	GACAGAAAGATGCTTTGCTTGGA
